# Supplementary material
Source: publisher site journal article supplement (https://www.dovepress.com/article/605729)
Supplement: Supplementary file 1 [file 605729%20Supplementary%20Material.docx]

**Supplemental Figure 1.**

**
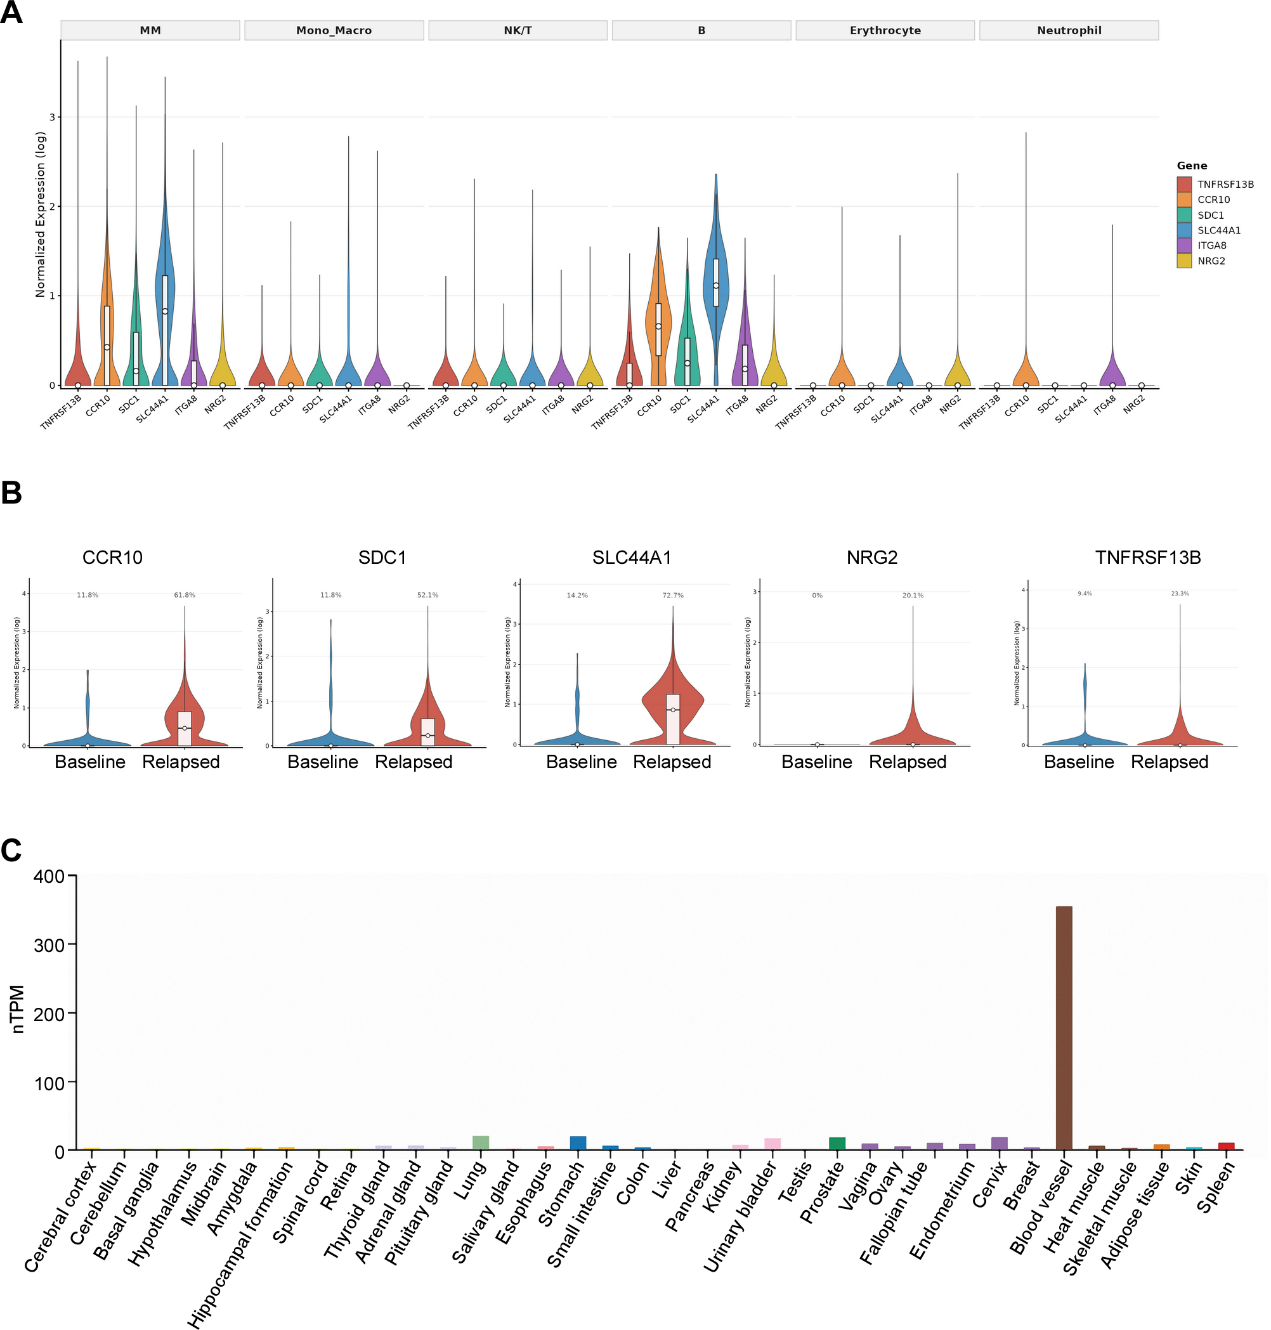
**

(**A**) Violin plots showing normalized expression of six candidate genes (TNFRSF13B, CCR10, SDC1, SLC44A1, ITGA8, and NRG2) across major cell types in the bone marrow microenvironment in the GSE143317 cohort. (**B**) Violin plots comparing the normalized expression and percentage of myeloma cells positive for SDC1, TNFRSF13B, CCR10, SLC44A1, or NRG2 at baseline versus post-BCMA CAR-T relapse in the GSE143317 cohort. (**C**) ITGA8 mRNA expression across normal human tissues from the GTEx database, as reported in the Human Protein Atlas (HPA). Expression levels are shown in normalized transcripts per million (nTPM).

**Supplemental Figure 2.**

**
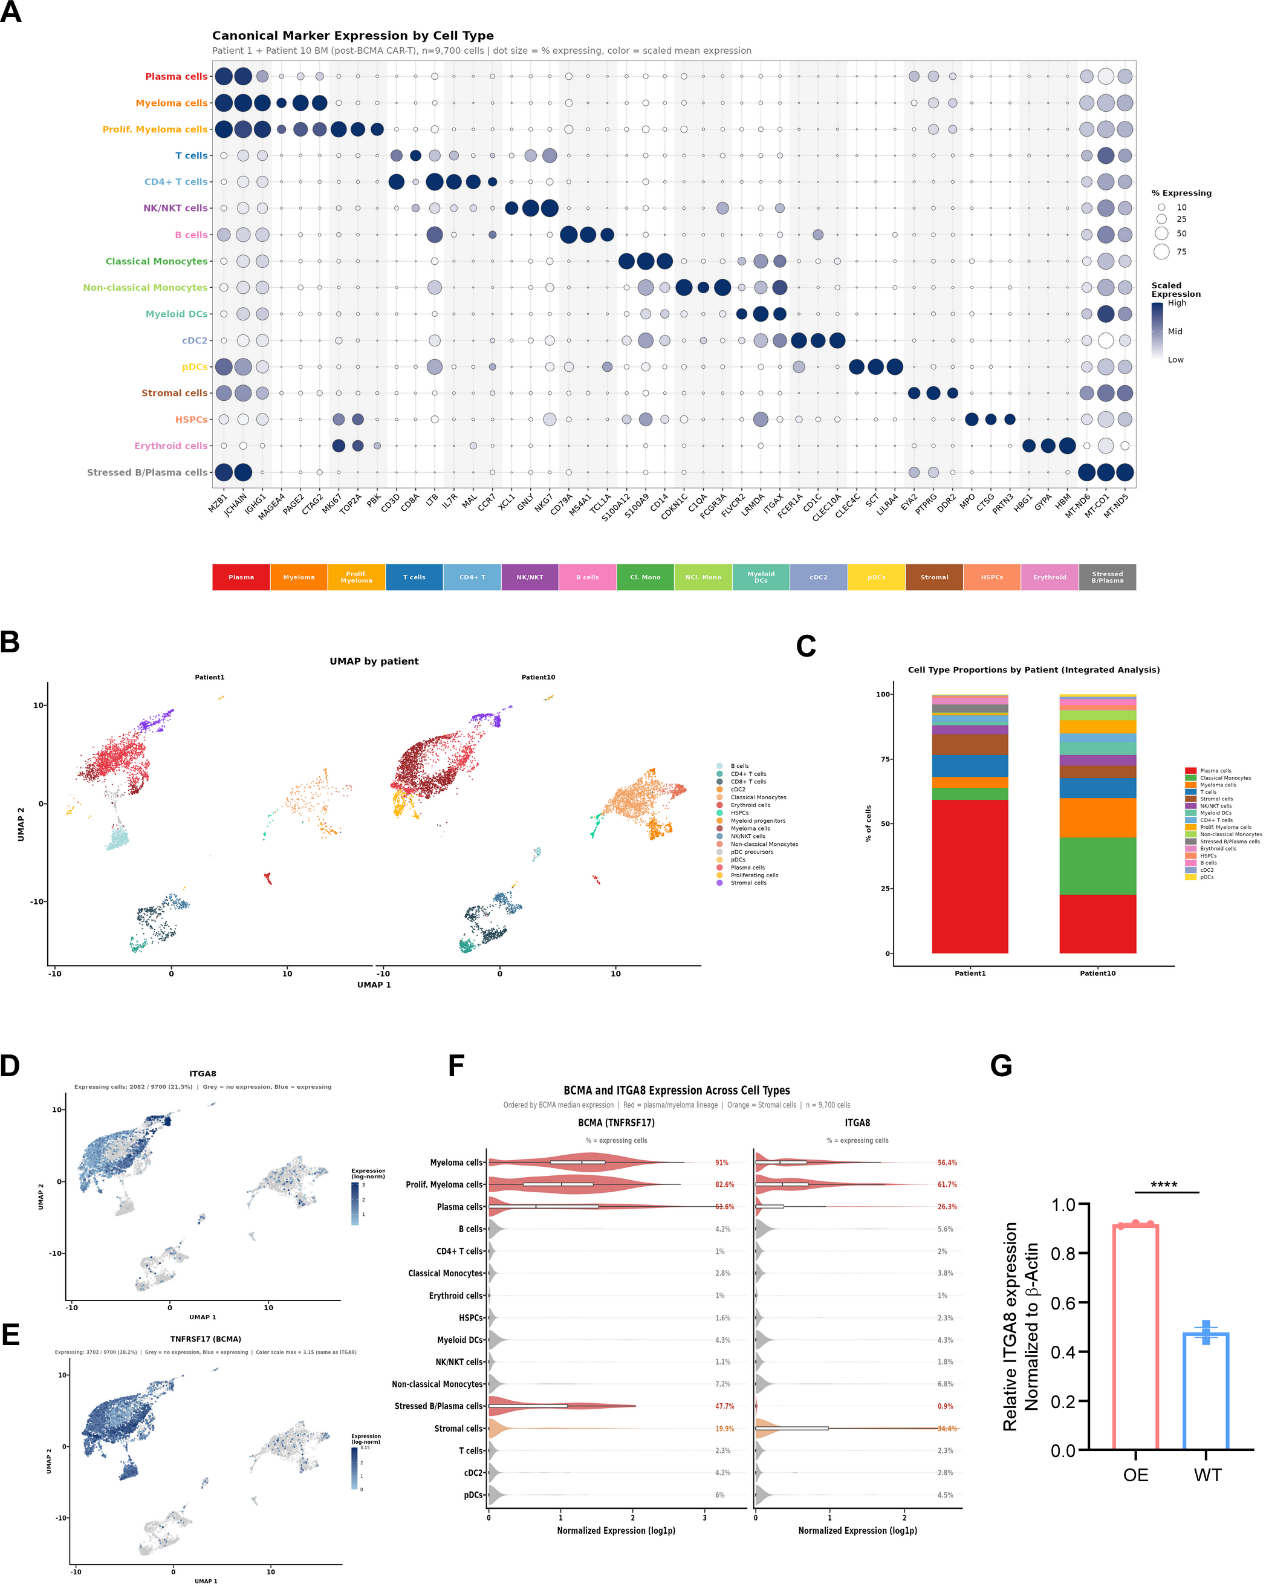
**

(**A**) Dot plot showing canonical marker expression for each identified cell type in the integrated dataset (n = 9,700 cells). Dot size represents the percentage of cells expressing the marker, and color intensity indicates scaled mean expression. (**B**) UMAP projections of single cells from Patient 1 and Patient 10, colored by cell type. **(C)** Stacked bar chart showing the relative proportions of each cell type in the bone marrow of Patient 1 and Patient 10. **(D, E)** Feature plots on UMAP showing log-normalized expression of ITGA8 (D) and TNFRSF17 (BCMA) (E). The percentage of expressing cells is indicated in each plot. **(F)** Violin plots comparing TNFRSF17 (BCMA) and ITGA8 expression across all cell types. The percentage of cells expressing each gene is labeled for each population. (**G**) Quantification of ITGA8 protein expression in ITGA8-overexpressing (OE) versus wild-type (WT) MM.1S cells, corresponding to the Western blot shown in Figure 1H. Data are normalized to β-Actin and presented as mean ± SEM from three independent experiments. *****p* < 0.0001 by two-tailed Student’s t-test.

**Supplemental Figure 3.**

**
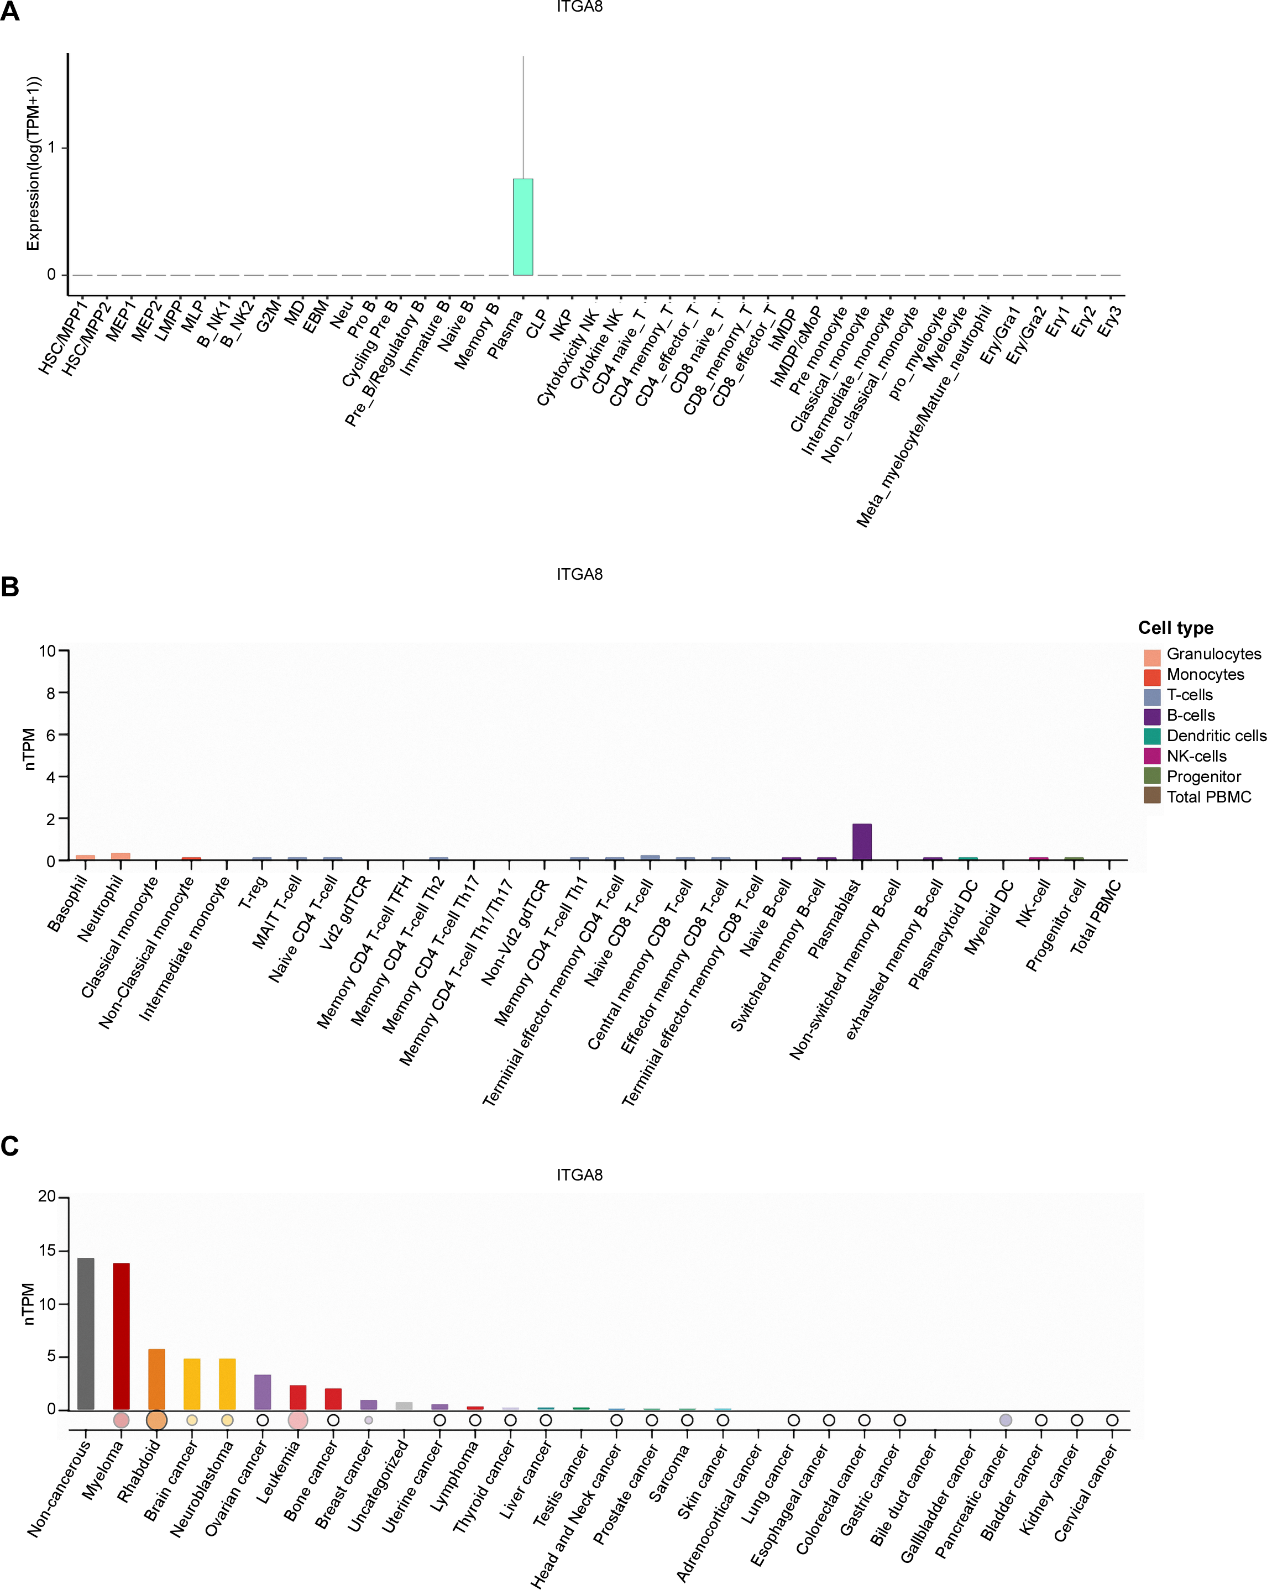
**

(**A**) Bar plots depict the global distribution of ITGA8 across the Human blood Atlas. TPM: Transcripts per million.(**B**) Bar plots show the expression levels of ITGA8 across the indicated cell types from Human Protein Altas. (**C**) Bar plots show the expression levels of ITGA8 across diverse cancer types from Human Protein Atlas.

**Supplemental Figure 4.**

**
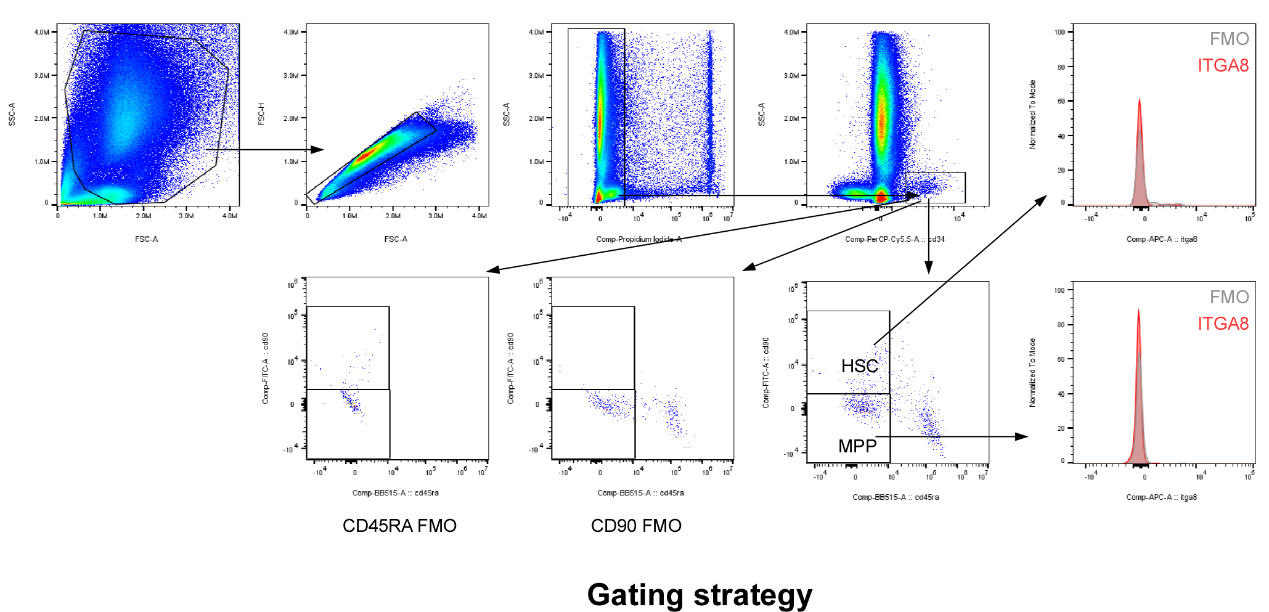
**

Representative sequential gating strategy to identify hematopoietic stem cells (HSCs) and multipotent progenitor cells (MPPs) from healthy donor bone marrow and mobilized peripheral blood samples. After red blood cell lysis, live cells were gated based on forward scatter (FSC) and side scatter (SSC), followed by selection of CD34⁺ cells. HSCs (CD34⁺CD45RA⁻CD90⁺) and MPPs (CD34⁺CD45RA⁻CD90⁻) were further resolved, and ITGA8 expression was assessed using an anti‑Integrin α8‑APC antibody. Fluorescence minus one (FMO) controls for each fluorochrome were included to define positive expression thresholds.

**Supplemental Figure 5.**

**
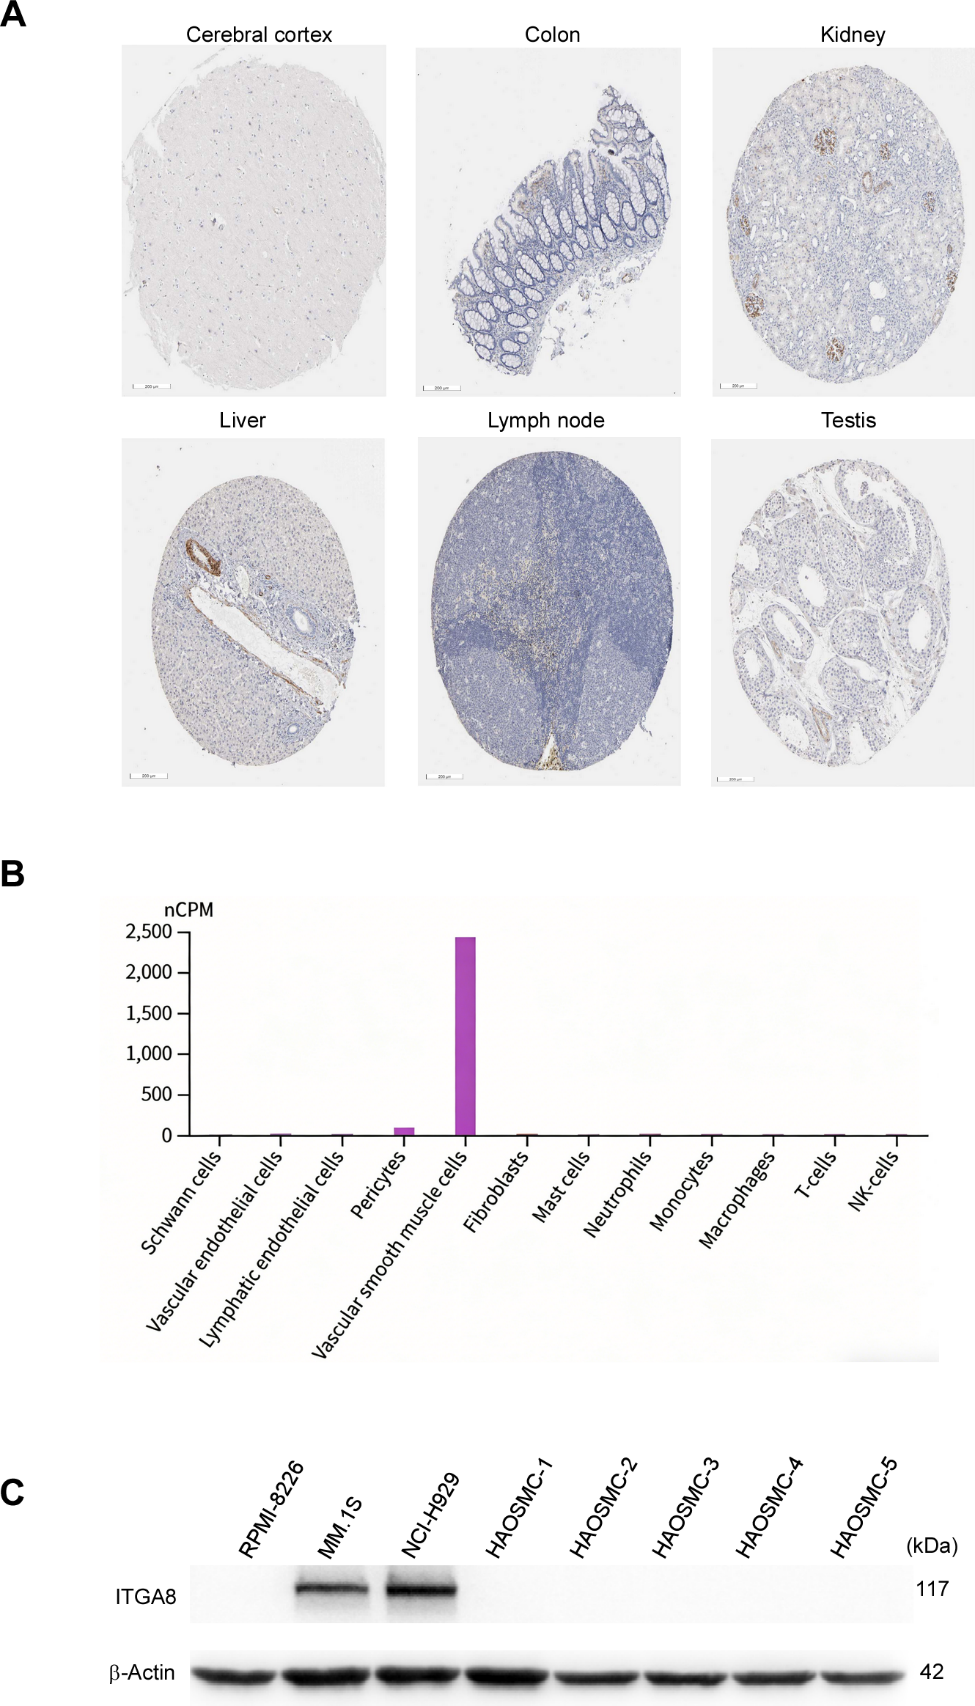
**

(**A**) Immunohistochemical staining for ITGA8 in selected normal human tissues, including cerebral cortex, colon, kidney, liver, lymph node, and testis. Images are from the Human Protein Atlas (HPA). (**B**) ITGA8 mRNA expression across cell types within human blood vessels, based on GTEx dataset data. Expression levels are shown in normalized counts per million (nCPM). (**C**) Western blot analysis of ITGA8 protein expression in myeloma cell lines (RPMI-8226, MM.1S, NCI-H929) and primary human aortic smooth muscle cells (HAoSMC 1–5) after 6 passages in standard culture conditions. β-Actin served as a loading control.

**Supplemental Table 1** Phage ELISA binding data of five anti-α8β1 scFv clones against α8 protein (GDR10-1) and α8β1 protein (CT016-H2508H) at varying coating concentrations

| 2nd | | Rabbit Anti-Mouse IgG F(ab)2/HRP-0.09ug/mL | | | | | | | |
| --- | --- | --- | --- | --- | --- | --- | --- | --- | --- |
| Coating | | GDR10-2(GDR10-1)-0.1ug/mL | | | | GDR10-2 (GDR10-1)-1ug/mL | | | |
| Sample(1ug/mL) | | OD450-1 | OD450-2 | AVERAGE | OD450-B | OD450-1 | OD450-2 | AVERAGE | OD450-B |
| Blank | | 0.04 | 0.04 | 0.04 | / | 0.05 | 0.05 | 0.05 | / |
| GDR10-2-M001 | HB18SE1702 | 3.98 | 4.02 | 4.00 | 3.96 | 4.11 | 4.07 | 4.09 | 4.04 |
| GDR10-2-M006 | HB18SE1703 | 3.56 | 3.73 | 3.65 | 3.61 | 4.22 | 4.44 | 4.33 | 4.28 |
| GDR10-2-M007 | HB18SE1704 | 2.98 | 3.20 | 3.09 | 3.05 | 4.09 | 4.03 | 4.06 | 4.01 |
| GDR10-2-M020 | HB18SE1705 | 3.61 | 3.78 | 3.69 | 3.65 | 4.27 | 4.35 | 4.31 | 4.26 |
| GDR10-2-M065 | HB18SE1706 | 3.81 | 3.88 | 3.85 | 3.81 | 4.16 | 4.11 | 4.14 | 4.09 |
| 2nd | | Rabbit Anti-Mouse IgG F(ab)2/HRP-0.09ug/mL | | | | | | | |
| Coating | | GDR10-2 (CT016-H2508H)-0.1ug/mL | | | | GDR10-2 (CT016-H2508H)-1ug/mL | | | |
| Sample(1ug/mL) | | OD450-1 | OD450-2 | AVERAGE | OD450-B | OD450-1 | OD450-2 | AVERAGE | OD450-B |
| Blank | | 0.05 | 0.05 | 0.05 | / | 0.11 | 0.12 | 0.11 | / |
| GDR10-2-M001 | HB18SE1702 | 3.98 | 4.03 | 4.00 | 3.95 | 3.96 | 3.88 | 3.92 | 3.81 |
| GDR10-2-M006 | HB18SE1703 | 0.42 | 0.39 | 0.40 | 0.35 | 4.14 | 4.26 | 4.20 | 4.09 |
| GDR10-2-M007 | HB18SE1704 | 0.52 | 0.50 | 0.51 | 0.46 | 4.02 | 3.96 | 3.99 | 3.88 |
| GDR10-2-M020 | HB18SE1705 | 1.34 | 1.32 | 1.33 | 1.28 | 4.22 | 4.34 | 4.28 | 4.17 |
| GDR10-2-M065 | HB18SE1706 | 2.95 | 2.93 | 2.94 | 2.89 | 4.04 | 3.93 | 3.98 | 3.87 |

**Supplemental Table 2** Correlation between ITGA8 expression and disease characteristics of multiple myeloma patients

| Characteristics | | ITGA8 high | | ITGA8 low | | *p* value |
| --- | --- | --- | --- | --- | --- | --- |
| Sex, n/N | | | | | | |
| Male | | 12/22 | | 10/18 | |  |
| Female | | 10/22 | | 8/18 | | 0.950 |
| Age, years, n | | | | | | |
| ≦60 | 16/22 | | 12/18 | |  | |
| >60 | 6/22 | | 4/18 | | 0.890 | |
| Heavy chain, Ig G, n | | | | | | |
| Yes | 16/22 | | 10/18 | |  | |
| No | 6/22 | | 8/18 | | 0.257 | |
| Light chain, n | | | | | | |
| κ | 10/22 | | 6/18 | |  | |
| λ | 12/22 | | 12/18 | | 0.436 | |
| ISS stage, n | | | | | | |
| Ⅰ+Ⅱ | 4/22 | | 10/18 | |  | |
| Ⅲ | 18/22 | | 8/18 | | 0.006 | |
| Relapsed, n | | | | | | |
| No | 18/22 | | 10/18 | |  | |
| Yes | 4/22 | | 8/18 | | 0.071 | |
| β2-MG, n | | | | | | |
| ≦2.5 mg/L | 4/22 | | 6/18 | |  | |
| >2.5 mg/L | 18/22 | | 12/18 | | 0.271 | |
| 1q+, n | | | | | | |
| Yes | 9/16 | | 8/14 | |  | |
| No | 7/16 | | 6/14 | | 0.963 | |

**Note:** Some variables contained missing values; valid sample sizes are indicated as n/N. ISS, international stage system; β2-MG, β2-microglobulin. Data are presented as n/N. Comparisons between groups were performed using the Pearson χ² test.
